# Supplementary material for: Comparative Genomic Analysis of Cold-Water Coral-Derived Sulfitobacter faviae: Insights into Their Habitat Adaptation and Metabolism
Source: MDPI journal article supplement (doi:10.3390/md21050309), 2023-05-19
Supplement: s1 [file s1]

**Table S1.** Information of *Sulfitobacter* from genomes assembled from pure culture (PC) or metagenomic data (MAG). NA: not available.

| Strain                                                     | contig | CDS   | Size (Mbp) | GC%   | Source | Isolation                                           | accessions      | Reference |
|------------------------------------------------------------|--------|-------|------------|-------|--------|-----------------------------------------------------|-----------------|-----------|
| <i>Jannaschia aquimarina</i> GSW-M26 <sup>T</sup>          | 81     | 3,987 | 4.10       | 66.40 | PC     | seawater off the southern coast of Korea            | GCA_000877395.1 | [1]       |
| <i>Jannaschia formosa</i> 12N15 <sup>T</sup>               | 133    | 4,456 | 4.73       | 69.60 | PC     | marine saltern sediment                             | GCA_003340555.1 | [2]       |
| <i>Sulfitobacter aestuariivivens</i> TSTF-M16 <sup>T</sup> | 14     | 4,057 | 4.20       | 59    | PC     | tidal flat sediment                                 | GCA_014763045.1 | [3]       |
| <i>Sulfitobacter alexandrii</i> AM1-D1 <sup>T</sup>        | 6      | 4,464 | 4.70       | 64.6  | PC     | Myzozoa Cavalier <i>Alexandrium minutum</i>         | GCA_001886735.1 | [4]       |
| <i>Sulfitobacter algicola</i> 1151 <sup>T</sup>            | 70     | 3,878 | 3.97       | 51.8  | pc     | green algae from Weihai coastal seawater            | GCA_013315265.1 | [5]       |
| <i>Sulfitobacter brevis</i> DSM 11443 <sup>T</sup>         | 68     | 3,977 | 4.24       | 58.4  | PC     | Ekho Lake water                                     | GCA_900112755.1 | [6]       |
| <i>Sulfitobacter delicatus</i> DSM 16477 <sup>T</sup>      | 34     | 3,807 | 3.94       | 60.80 | PC     | Echinodermata <i>Stellaster equestris</i>           | GCA_900102535.1 | [7]       |
| <i>Sulfitobacter donghicola</i> DSW-25                     | 9      | 3,347 | 3.54       | 55.20 | NA     | coastal seawater                                    | GCA_000622405.1 | NA        |
| <i>Sulfitobacter dubius</i> DSM 16472 <sup>T</sup>         | 21     | 3,520 | 3.67       | 60.20 | PC     | Monocotyledoneae <i>Zostera marina</i>              | GCA_900113435.1 | [7]       |
| <i>Sulfitobacter geojensis</i> TR60-85                     | 21     | 4,066 | 4.32       | 57.60 | MAG    | The surface seawater at the Pearl River Estuary     | GCA_016814695.1 | [8]       |
| <i>Sulfitobacter guttiformis</i> KCTC 32187                | 4      | 3,701 | 3.98       | 56.10 | NA     | coastal sea water                                   | GCA_000622425.1 | NA        |
| <i>Sulfitobacter indolifex</i> DSM 14862 <sup>T</sup>      | 8      | 4,211 | 4.50       | 59.20 | PC     | Seawater from the North Sea by Helgoland            | GCF_022788665.1 | NA        |
| <i>Sulfitobacter litoralis</i> DSM 17584 <sup>T</sup>      | 63     | 3,510 | 3.68       | 58.20 | PC     | East sea water                                      | GCA_900103185.1 | [9]       |
| <i>Sulfitobacter marinus</i> DSM 23422 <sup>T</sup>        | 12     | 3,417 | 3.57       | 56.90 | NA     | Sea water                                           | GCA_900116285.1 | NA        |
| <i>Sulfitobacter maritimus</i> S0837 <sup>T</sup>          | 38     | 3,565 | 3.79       | 59.80 | PC     | coastal water sediment                              | GCA_013346665.1 | [10]      |
| <i>Sulfitobacter mediterraneus</i> SC7-37                  | 6      | 3,873 | 4.05       | 58.48 | MAG    | Ochrophyta <i>Skeletonema costatum</i> from Estuary | GCA_021043225.1 | [8]       |
| <i>Sulfitobacter</i> sp. strain EL44                       | 14     | 4,006 | 4.20       | 58.10 | PC     | Gorgonian coral <i>Eunicella labiate</i>            | GCA_900313045.1 | [11-13]   |
| <i>Sulfitobacter noctilucae</i> NB-68 <sup>T</sup>         | 14     | 3,664 | 3.91       | 58.30 | PC     | coastal seawater around Geoje island                | GCA_000622365.1 | [14]      |

|                                                            |    |       |      |       |    |                                             |                       |              |
|------------------------------------------------------------|----|-------|------|-------|----|---------------------------------------------|-----------------------|--------------|
| <i>Sulfitobacter noctilucicola</i> NB-77 <sup>T</sup>      | 8  | 3,893 | 4.09 | 57.10 | PC | coastal seawater around Geoje island        | GCA_000622385.1       | [14]         |
| <i>Sulfitobacter pontiacus</i> 3SOLIMAR09                  | 25 | 3,282 | 3.45 | 60.40 | PC | water samples from Cala Figuera harbors     | GCA_000647675.1       | [15]         |
| <i>Sulfitobacter sabulilitoris</i> HSMS-29 <sup>T</sup>    | 19 | 3,711 | 3.95 | 64.40 | PC | marine sand sample from the Yellow Sea      | GCA_005887615.1       | [16]         |
| <i>Sulfitobacter sediminilitoris</i> JBTF-M27 <sup>T</sup> | 99 | 4,473 | 4.86 | 57.80 | PC | tidal flat from Yellow Sea                  | GCA_010667575.1       | [3]          |
| <i>Sulfitobacter undariae</i> DSM 102234 <sup>T</sup>      | 44 | 3,632 | 3.85 | 54.70 | PC | Leachate from a brown algae reservoir       | GCA_014196805.1       | NA           |
| <i>Sulfitobacter faviae</i> S5-53                          | 7  | 4,696 | 3.86 | 62.30 | PC | Scleractinia Coral <i>Favia veroni</i>      | SRR6128330            | [17]         |
| <i>Sulfitobacter faviae</i> SCSIO W1865                    | 5  | 3,939 | 4.03 | 62    | PC | Cold water coral (115.3945°E, 14.0321°N)    | CP116423<br>CP116427  | - This study |
| <i>Sulfitobacter faviae</i> SCSIO W1866                    | 4  | 3,585 | 3.61 | 62    | PC | Cold water coral (115°0.684'E, 13°20.568'N) | CP116419-<br>CP116422 | This study   |

**Table S2.** List of lipid metabolism genes and antifreeze proteins in SCSIO W1865 and SCSIO W1866. Chr indicates chromosome, and none of the listed genes are identified in GIs and prophages.

| Lipid metabolism genes (KEGG pathways) | SCSIO W1865  |           |           |           |        | SCSIO W1866 |           |           |        |
|----------------------------------------|--------------|-----------|-----------|-----------|--------|-------------|-----------|-----------|--------|
|                                        | Gene/Protein | location  | start     | stop      | strand | location    | start     | stop      | strand |
| ko00061 Fatty acid biosynthesis        | <i>fabG</i>  | Chr       | 1,587,104 | 1,587,841 | +      | Chr         | 1,862,587 | 1,863,324 | -      |
|                                        |              | Plasmid1  | 812       | 1,600     | +      | Plasmid2    | 90,801    | 91,553    | +      |
|                                        |              | Plasmid1  | 139,844   | 140,596   | -      |             |           |           |        |
|                                        |              | Plasmid1  | 241,292   | 242,122   | -      |             |           |           |        |
|                                        |              | .Plasmid3 | 7,047     | 7,817     | +      |             |           |           |        |
|                                        | <i>fabI</i>  | Chr       | 1,096,001 | 1,096,756 | -      | Chr         | 1,740,020 | 1,740,826 | +      |
|                                        |              | Chr       | 1,709,645 | 1,710,451 | -      | Chr         | 2,259,841 | 2,260,596 | +      |
|                                        |              | Plasmid3  | 15,663    | 16,490    | +      |             |           |           |        |
|                                        | <i>fabD</i>  | Chr       | 1,586,105 | 1,587,037 | +      | Chr         | 1,863,394 | 1,864,326 | -      |
|                                        | <i>fabB</i>  | Chr       | 1,096,802 | 1,098,031 | -      | Chr         | 2,258,566 | 2,259,795 | +      |
|                                        | <i>fabH</i>  | Chr       | 1,743,955 | 1,744,926 | -      | Chr         | 1,705,528 | 1,706,499 | +      |
|                                        | <i>fabA</i>  | Chr       | 1,100,302 | 1,100,811 | -      | Chr         | 2,255,785 | 2,256,294 | +      |
|                                        | <i>fadD</i>  | Chr       | 42,5961   | 42,7931   | +      | Chr         | 439,284   | 441,254   | +      |
|                                        |              | Chr       | 714,733   | 716,553   | +      | Chr         | 2,599,562 | 2,601,382 | -      |
|                                        | <i>accC</i>  | Chr       | 1,565,187 | 1,566,539 | -      | Chr         | 1,883,867 | 18,85,219 | +      |
|                                        | <i>accA</i>  | Chr       | 3,047,359 | 3,048,321 | +      | Chr         | 2,954,054 | 2,955,016 | +      |
|                                        | <i>accD</i>  | Chr       | 3,115,733 | 3,116,692 | -      | Chr         | 3,022,341 | 3,023,300 | -      |
|                                        | <i>accB</i>  | Chr       | 1,566,549 | 1,567,058 | -      | Chr         | 1,883,351 | 1,883,857 | +      |
|                                        | <i>fabZ</i>  | Chr       | 2,045,423 | 2,045,893 | -      | Chr         | 1,362,828 | 1,363,298 | +      |
|                                        | <i>fabF</i>  | Chr       | 1,589,137 | 1,590,372 | +      | Chr         | 1,860,056 | 1,861,291 | -      |
| ko00071 Fatty acid degradation         | <i>frmA</i>  | Chr       | 1,188,250 | 1,189,365 | +      | Chr         | 2,161,938 | 2,163,053 | -      |
|                                        | <i>acd</i>   | Chr       | 1,175,271 | 1,176,545 | -      | Chr         | 1,913,344 | 1,914,495 | -      |
|                                        |              | Chr       | 1,535,768 | 1,536,919 | +      | Chr         | 726,725   | 727,873   | -      |
|                                        |              | Chr       | 2,676,061 | 2,677,209 | +      | Chr         | 2,174,764 | 2,176,038 | +      |
|                                        |              | Plasmid1  | 19,472    | 20,629    | -      |             |           |           |        |
|                                        |              | Plasmid1  | 234,912   | 236,078   | -      |             |           |           |        |
|                                        | <i>gcdH</i>  | Chr       | 2,662,718 | 2,663,941 | -      | Chr         | 739,991   | 741,214   | +      |
|                                        | <i>alkM</i>  | Chr       | 338,815   | 339,963   | -      | Chr         | 351,832   | 352,980   | -      |

|                                          |                  |          |           |           |   |          |           |           |   |
|------------------------------------------|------------------|----------|-----------|-----------|---|----------|-----------|-----------|---|
|                                          |                  | Chr      | 2,362,841 | 2,363,839 | + | Chr      | 1,031,046 | 1,032,047 | - |
|                                          | <i>hcaD</i>      | Chr      | 309,077   | 310,282   | + | Chr      | 322,099   | 323,304   | + |
|                                          | <i>atoB</i>      | Chr      | 193,146   | 194,351   | - | Chr      | 193,345   | 194,550   | - |
|                                          |                  | Chr      | 377,223   | 378,356   | + | Chr      | 390,180   | 391,313   | + |
|                                          |                  | Chr      | 636,317   | 637,492   | + | Chr      | 636,165   | 637,391   | - |
|                                          |                  | Chr      | 2,677,998 | 2,679,212 | + | Chr      | 724,722   | 725,936   | - |
|                                          |                  | Chr      | 2,768,119 | 2,769,345 | + | Chr      | 2,654,333 | 2,655,508 | - |
|                                          |                  | Chr      | 3,023,892 | 3,024,998 | + | Chr      | 2,930,960 | 2,932,066 | + |
|                                          |                  | Chr      | 3,236,069 | 3,237,250 | + | Chr      | 3,142,612 | 3,143,811 | + |
|                                          |                  | Plasmid1 | 3,648     | 4,886     | + | Plasmid2 | 85,823    | 86,995    | - |
|                                          |                  | Plasmid1 | 15,468    | 16,619    | - |          |           |           |   |
|                                          |                  | Plasmid1 | 47,519    | 48,706    | - |          |           |           |   |
|                                          |                  | Plasmid1 | 144,405   | 145,574   | + |          |           |           |   |
|                                          |                  | Plasmid1 | 242,147   | 243,331   | - |          |           |           |   |
|                                          |                  | Plasmid4 | 46,536    | 47,735    | - |          |           |           |   |
|                                          | <i>paaF/echA</i> | Chr      | 1,630,915 | 1,631,958 | - | Chr      | 1,818,484 | 1,819,527 | + |
|                                          |                  | Plasmid1 | 2,819     | 3,631     | + |          |           |           |   |
|                                          | <i>fadI</i>      | Chr      | 2,679,233 | 2,681,434 | + | Chr      | 722,500   | 724,701   | - |
|                                          | <i>fadN</i>      | Chr      | 634,224   | 636,320   | + | Chr      | 2,655,505 | 2,657,601 | - |
| ko00120 Primary bile acid biosynthesis   | <i>mcr</i>       | Chr      | 170,891   | 171,994   | + | Chr      | 171,086   | 172,189   | + |
|                                          |                  | Plasmid1 | 13,440    | 14,576    | - |          |           |           |   |
| ko00121 Secondary bile acid biosynthesis | <i>hdhA</i>      | Chr      | 2,994,623 | 2,995,423 | - | Chr      | 2,901,688 | 2,902,488 | - |
| ko00561 Glycerolipid metabolism          | ALDH             | Chr      | 399,417   | 401,780   | - | Chr      | 412,740   | 415,103   | - |
|                                          | <i>glpK</i>      | Plasmid2 | 174,082   | 175,578   | - | Plasmid1 | 113,093   | 114,589   | - |
|                                          |                  |          |           |           |   | Plasmid2 | 41,015    | 42,493    | - |
|                                          | <i>lip</i>       | Chr      | 2,728,076 | 2,728,876 | - | Chr      | 675,064   | 675,864   | + |
|                                          | <i>plsX</i>      | Chr      | 1,744,923 | 1,745,999 | - | Chr      | 1,704,455 | 1,705,531 | + |
|                                          | <i>plsY</i>      | Chr      | 2,795,211 | 2,795,819 | + | Chr      | 609,690   | 610,298   | - |
|                                          | <i>gckA</i>      | Chr      | 1,086,720 | 1,088,018 | + | Chr      | 2,268,602 | 2,269,873 | - |
|                                          | <i>bgsB</i>      | Plasmid3 | 54,012    | 56,240    | + |          |           |           |   |
| ko00564 Glycerophospholipid metabolism   | <i>gpsA</i>      | Chr      | 111,046   | 111,999   | - | Chr      | 111,045   | 111,998   | - |

|                                 |                    |          |           |           |   |          |           |           |   |
|---------------------------------|--------------------|----------|-----------|-----------|---|----------|-----------|-----------|---|
|                                 | <i>glpA</i>        | Plasmid2 | 181,666   | 183,255   | - | Plasmid1 | 120,677   | 122,266   | - |
|                                 |                    |          |           |           |   | Plasmid2 | 42,575    | 44,134    | - |
|                                 | <i>pmtA</i>        | Chr      | 1,101,426 | 1,102,043 | - | Chr      | 2,254,553 | 2,255,170 | + |
|                                 | <i>cdsA</i>        | Chr      | 2,051,891 | 2,052,643 | - | Chr      | 1,356,095 | 1,356,829 | + |
|                                 | <i>pgsA</i>        | Chr      | 2,802,990 | 2803,655  | - | Chr      | 601,854   | 602,519   | + |
|                                 | <i>pcs</i>         | Chr      | 1,154,486 | 1,155,181 | - | Chr      | 2,199,919 | 2,200,614 | + |
|                                 | <i>pldB</i>        | Chr      | 1,270,742 | 1,271,689 | - | Chr      | 2,079,894 | 2,080,841 | + |
|                                 | <i>pgpA</i>        | Chr      | 2,004,262 | 2,004,753 | + | Chr      | 1,403,770 | 1,404,261 | - |
|                                 | PLD1_2             | Plasmid2 | 147,035   | 148,621   | - | Plasmid1 | 86,048    | 87,634    | - |
|                                 | <i>psd</i>         | Chr      | 1,102,835 | 1,103,527 | - | Chr      | 2,253,069 | 2,253,761 | + |
|                                 | <i>clsA_B</i>      | Chr      | 1,718,064 | 1,719,434 | - | Chr      | 1,731,024 | 1,732,394 | + |
|                                 |                    | Plasmid3 | 19,418    | 20,614    | + |          |           |           |   |
|                                 | <i>pssA</i>        | Chr      | 1,102,045 | 1,102,824 | - | Chr      | 2,253,772 | 2,254,551 | + |
| ko00600 Sphingolipid metabolism | <i>aslA</i>        |          |           |           |   | Plasmid2 | 38501     | 40144     | - |
| <b>antifreeze proteins</b>      | Antifreeze protein | Chr      | 558,196   | 558,480   | + | Chr      | 846,649   | 847,770   | + |
|                                 | Antifreeze protein | Chr      | 2,550,523 | 2,551,644 | + | Chr      | 2,740,088 | 2,740,372 | + |

**Table S3. List of secondary metabolites.**

|                    | Type             | Start     | Stop      | Location | Most similar known Cluster | Similarity (%) |
|--------------------|------------------|-----------|-----------|----------|----------------------------|----------------|
| <b>SCSIO W1865</b> |                  |           |           |          |                            |                |
|                    | Hserlactone      | 1,116,139 | 1,136,864 | Chr.     | -                          | -              |
|                    | Terpene          | 1,715,834 | 1,736,598 | Chr.     | -                          | -              |
|                    | $\beta$ -lactone | 2,220,504 | 2,247,181 | Chr.     | corynecine                 | 13             |
|                    | NRPS-PKS         | 2,399,621 | 2,451,645 | Chr.     | -                          | -              |
|                    | Ectoine          | 3,219,386 | 3,229,778 | Chr.     | Ectoine                    | 100            |
|                    | $\beta$ -lactone | 261,811   | 287,790   | Pla.1    | -                          | -              |
| <b>SCSIO W1866</b> |                  |           |           |          |                            |                |
|                    | NRPS-PKS         | 954,610   | 1,006,634 | Chr.     | -                          | -              |
|                    | $\beta$ -lactone | 1,149,913 | 1,176,591 | Chr.     | -                          | -              |
|                    | Hserlactone      | 1,692,470 | 1,712,611 | Chr.     | -                          | -              |
|                    | Hserlactone      | 2,218,302 | 2,239,027 | Chr.     | -                          | -              |
|                    | Ectoine          | 3,125,995 | 3,136,387 | Chr.     | Ectoine                    | 100            |

**Table S4. List of sulfite oxidation genes in SCSIO W1865 and SCSIO W1866.** The similarities showed the protein identities of enzymes in SCSIO W1866 with their homologues in SCSIO W1865.

|                    | Gene        | Start     | Stop      | Strand | Description                                                         | Similarity(%) |
|--------------------|-------------|-----------|-----------|--------|---------------------------------------------------------------------|---------------|
| <b>SCSIO W1865</b> | <i>soxR</i> | 1,552,644 | 1,552,306 | -      | Sulfur oxidation cycle transcriptional regulator                    |               |
|                    | <i>soxS</i> | 1,553,012 | 1,552,641 | -      | Periplasmic thiol--disulfide oxidoreductase                         |               |
|                    | <i>soxV</i> | 1,553,110 | 1,553,847 | +      | Cytochrome c-type biogenesis protein                                |               |
|                    | <i>soxW</i> | 1,553,876 | 1,554,460 | +      | Periplasmic thioredoxin                                             |               |
|                    | <i>soxX</i> | 1,554,596 | 1,555,072 | +      | SoxY-Cys110-persulfide--sulfur compound transferase                 |               |
|                    | <i>soxY</i> | 1,555,193 | 1,555,612 | +      | Sulfur oxidation cycle carrier protein                              |               |
|                    | <i>soxZ</i> | 1,555,644 | 1,555,973 | +      | Sulfur oxidation cycle carrier protein,                             |               |
|                    | <i>soxA</i> | 1,556,018 | 1,556,869 | +      | SoxY-Cys110-persulfide--sulfur compound transferase                 |               |
|                    | <i>soxB</i> | 1,556,957 | 1,558,657 | +      | SoxZY-persulfide-sulfonate hydrolase,                               |               |
|                    | <i>soxC</i> | 1,558,731 | 1,559,993 | +      | Periplasmic sulfane dehydrogenase, molybdopterin-containing subunit |               |
|                    | <i>soxD</i> | 1,559,977 | 1,561,035 | +      | Periplasmic sulfane dehydrogenase, diheme c-type cytochrome subunit |               |
|                    | <i>soxG</i> | 1,905,756 | 1,906,688 | +      | Thiosulfate-induced periplasmic zinc metallohydrolase               |               |
|                    | <i>soxH</i> | 1,906,685 | 1,907,632 | +      | Thiosulfate-induced periplasmic zinc metallohydrolase               |               |
|                    | <i>soxH</i> | 1,540,873 | 1,539,926 | -      | Thiosulfate-induced periplasmic zinc metallohydrolase               | 97.46         |
| <b>SCSIO W1866</b> | <i>soxG</i> | 1,541,787 | 1,540,870 | -      | Thiosulfate-induced periplasmic zinc metallohydrolase               | 96.39         |
|                    | <i>soxD</i> | 1,890,395 | 1,889,337 | -      | Periplasmic sulfane dehydrogenase, diheme c-type cytochrome subunit | 98.30         |
|                    | <i>soxC</i> | 1,891,641 | 1,890,379 | -      | Periplasmic sulfane dehydrogenase, molybdopterin-containing subunit | 96.67         |
|                    | <i>soxB</i> | 1,893,415 | 1,891,715 | -      | SoxZY-persulfide-sulfonate hydrolase,                               | 98.23         |
|                    | <i>soxA</i> | 1,894,354 | 1,893,503 | -      | SoxY-Cys110-persulfide--sulfur compound transferase                 | 98.59         |
|                    | <i>soxZ</i> | 1,894,728 | 1,894,399 | -      | Sulfur oxidation cycle carrier protein                              | 100           |
|                    | <i>soxY</i> | 1,895,179 | 1,894,760 | -      | Sulfur oxidation cycle carrier protein                              | 100           |
|                    | <i>soxX</i> | 1,895,775 | 1,895,299 | -      | SoxY-Cys110-persulfide--sulfur compound transferase                 | 100           |
|                    | <i>soxW</i> | 1,896,495 | 1,895,911 | -      | Periplasmic thioredoxin                                             | 96.90         |
|                    | <i>soxV</i> | 1,897,261 | 1,896,524 | -      | Cytochrome c-type biogenesis protein                                | 99.18         |
|                    | <i>soxS</i> | 1,897,359 | 1,897,721 | +      | Periplasmic thiol--disulfide oxidoreductase                         | 95.12         |
|                    | <i>soxR</i> | 1,897,718 | 1,898,056 | +      | Sulfur oxidation cycle transcriptional regulator                    | 98.21         |

**Table S5.** List of DMSP related genes in SCSIO W1865 and SCSIO W1866. N and C indicate N terminus and C terminus of DmdA enzyme respectively. The similarities showed the protein identities of enzymes in SCSIO W1866 with their homologues in SCSIO W1865.

|                        | Gene         | Start     | Stop      | Location  | strand | Similarity (%)    |
|------------------------|--------------|-----------|-----------|-----------|--------|-------------------|
| <b>SCSIO<br/>W1865</b> | <i>dmdA</i>  | 1,820,764 | 1,821,750 | Chr.      | +      |                   |
|                        | <i>dmdB1</i> | 1,955,426 | 1,953,798 | Chr.      | -      |                   |
|                        | <i>dmdB2</i> | 51,252    | 49,630    | Plasmid 1 | -      |                   |
|                        | <i>dmdC</i>  | 2,673,993 | 2,675,774 | Chr.      | +      |                   |
|                        | <i>dmdD</i>  | 3,240,580 | 3,241,356 | Chr.      | +      |                   |
|                        | <i>dddA</i>  | 656,213   | 657,877   | Chr.      | +      |                   |
|                        | <i>dddC</i>  | 1,635,853 | 1,634,354 | Chr.      | -      |                   |
|                        | <i>dddP</i>  | 2,864,666 | 2,863,560 | Chr.      | -      |                   |
| <b>SCSIO<br/>W1866</b> | <i>dmdA1</i> | 1,629,782 | 1,629,081 | Chr       | -      | 99.04(N: 1-208)   |
|                        | <i>dmdA2</i> | 1,629,105 | 1,628,680 | Chr       | -      | 97.16(C: 227-367) |
|                        | <i>dmdB</i>  | 1,453,646 | 1,455,274 | Chr       | +      | 98.16             |
|                        | <i>dmdC</i>  | 729,941   | 728,160   | Chr       | -      | 98.99             |
|                        | <i>dmdD</i>  | 3,147,141 | 3,147,917 | Chr       | +      | 100.00            |
|                        | <i>dddA</i>  | 3,093,407 | 3,091,794 | Chr       | -      | 56.50             |
|                        | <i>dddC</i>  | 1,814,589 | 1,816,088 | Chr       | +      | 99.20             |
|                        | <i>dddP</i>  | 3,117,358 | 3,116,249 | Chr       | -      | 30.98             |

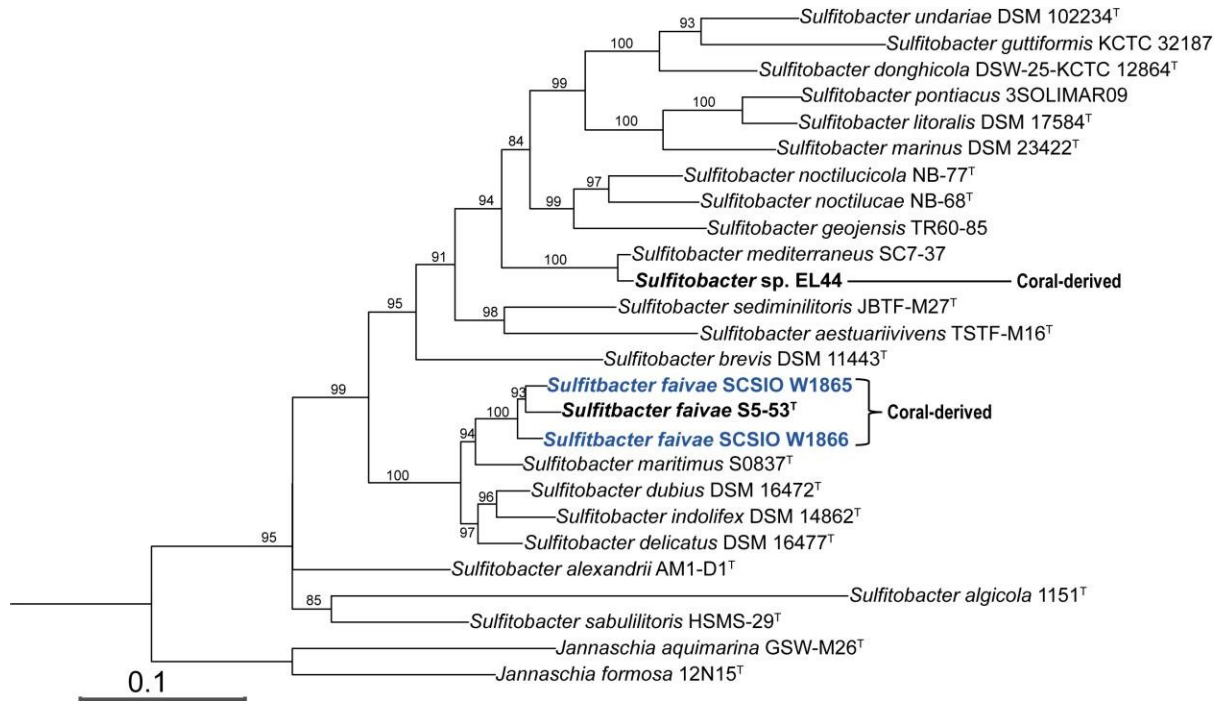

**Figure S1.** The maximum likelihood tree was constructed using PhyML 3.0 software [18] based on the genome sequences of SCSIO W1865, SCSIO W1866 and available *Sulfitobacter* genomes listed in Table S1. All genomes were aligned against the reference genome SCSIO W1865 using MUMmer (v3.0) [19] to generate whole-genome alignments and to identify single-nucleotide polymorphisms (SNPs) in the core genome, with repetitive regions removed. In total, 10,636 SNPs were identified in these 26 genomes. Based on the concatenated SNPs, a maximum-likelihood tree with 1000 fast bootstrap replicates was inferred using PhyML 3.0 under GTR+I+G substitution model. Branch lengths are proportional to the number of nucleotide substitutions.



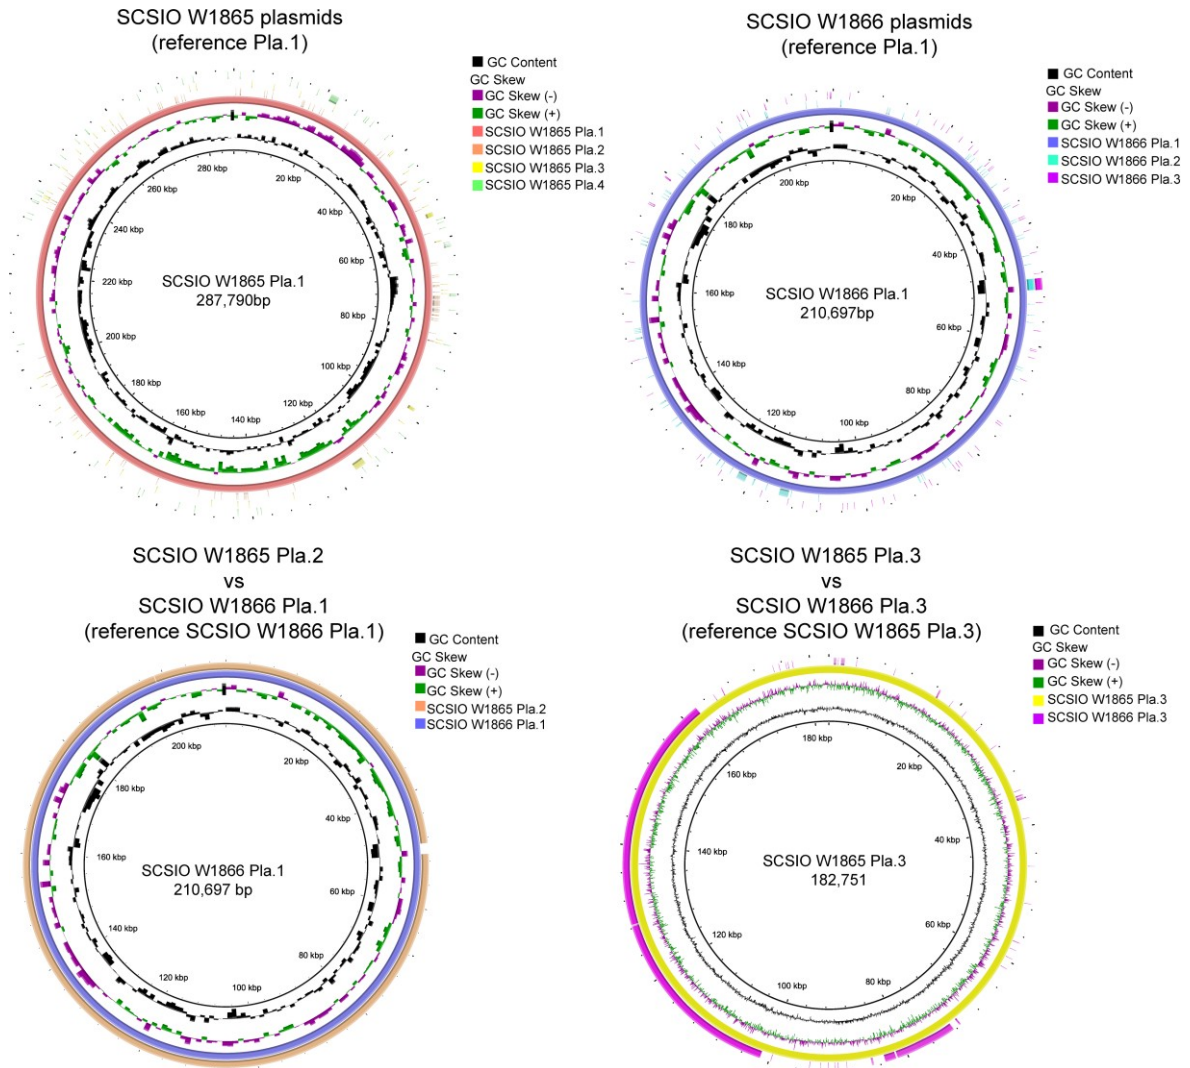

**Figure S2. Comparison between different endogenous megaplasmids.** The upper two panels showed the comparison among the endogenous megaplasmids in SCSIO W1865 and SCSIO W1866, separately. The lower panels showed the comparison between plasmids with identified similarities in nucleotide sequences.

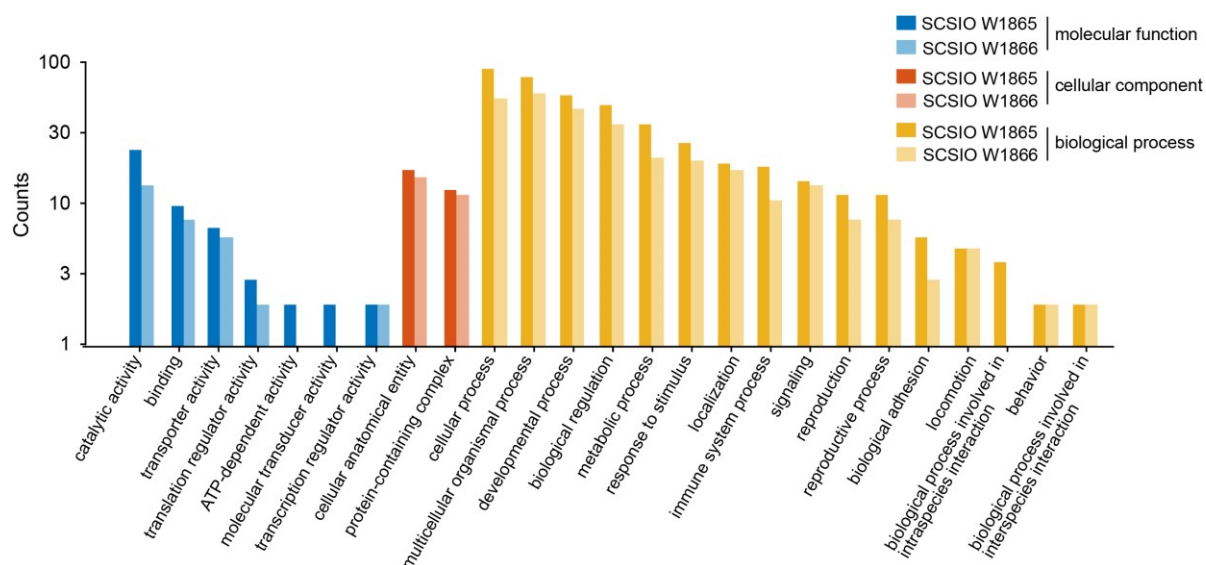

**Figure S3. Geno Ontology classification of megaplasmiids encoding genes.** The genes encoded by megaplasmiids in SCSIO W1866 and SCSIO W1865 were pooled separately. Then GO annotation was performed using eggNOG [20], and GO level counts was performed using TBTOOLS software.

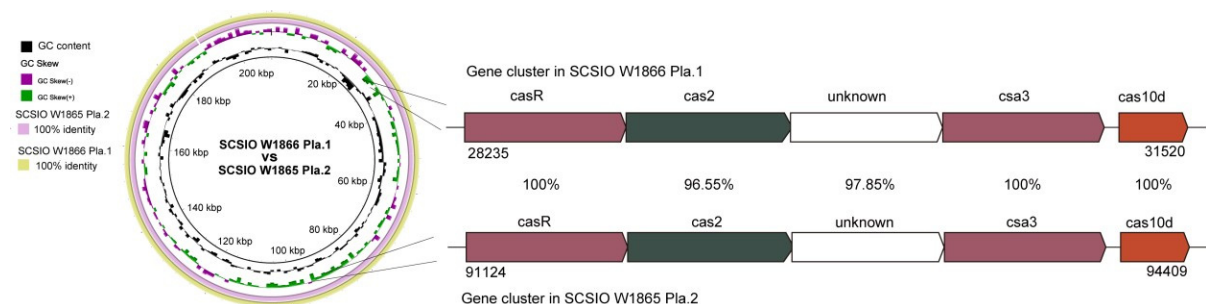

**Figure S4. Loci and alignment of two incomplete CRISPR-Cas cluster.** The genome sequence of SCSIO W1865 Pla.2 and SCSIO W1866 Pla.1 were aligned using BRIG. Their DNA sequences show high similarities (95.78%). The proteins in the predicted clusters were compared in NCBI and their identities were labeled. The number below SCSIO W1866 Pla.1 and SCSIO W1865 Pla.2 showed the start of the first gene and the stop of the last gene, respectively.

## References

1. Voget, S.; Diaz Valerio, S. M.; von Hoyningen-Huene, A. J.; Natramilarasu, P. K.; Vollheyde, K.; Xiao, S.; Daniel, R., Genome sequence of *Jannaschia aquimarina* GSW-M26, a member of the *Roseobacter* clade. *Genome Announc* **2015**, 3, (2), e00353-15.
2. Zhang, R.; Wang, C.; Wang, X. T.; Mu, D. S.; Du, Z. J., *Jannaschia formosa* sp. nov., isolated from marine saltern sediment. *Int. J. Syst. Evol. Microbiol.* **2019**, 69, (7), 2037-2042.
3. Park, S.; Chen, S.; Lee, J. S.; Kim, W.; Yoon, J. H. Description of *Sulfitobacter sediminilitoris* sp. nov., isolated from a tidal flat. *FEMS Microbiol. Lett.* **2020**, 367, fnaa074.
4. Yang, Q.; Ge, Y. M.; Iqbal, N. M.; Yang, X.; Zhang, X. L., *Sulfitobacter alexandrii* sp. nov., a new microalgae growth-promoting bacterium with exopolysaccharides biofloculant potential isolated from marine phycosphere. *Antonie van Leeuwenhoek* **2021**, 114, (7), 1091-1106.
5. Wang, C. N.; Liu, Y.; Wang, J.; Du, Z. J.; Wang, M. Y., *Sulfitobacter algicola* sp. nov., isolated from green algae. *Arch. Microbiol.* **2021**, 203, (5), 2351-2356.
6. Labrenz, M.; Tindall, B. J.; Lawson, P. A.; Collins, M. D.; Schumann, P.; Hirsch, P., *Staleyia guttiformis* gen. nov., sp. nov. and *Sulfitobacter brevis* sp. nov., alpha-3-Proteobacteria from hypersaline, heliothermal and meromictic antarctic Ekho Lake. *Int. J. Syst. Evol. Microbiol.* **2000**, 50 Pt 1, 303-313.
7. Ivanova, E. P.; Gorshkova, N. M.; Sawabe, T.; Zhukova, N. V.; Hayashi, K.; Kurilenko, V. V.; Alexeeva, Y.; Buljan, V.; Nicolau, D. V.; Mikhailov, V. V.; Christen, R., *Sulfitobacter delicatus* sp. nov. and *Sulfitobacter dubius* sp. nov., respectively from a starfish (*Stellaster equestris*) and sea grass (*Zostera marina*). *Int. J. Syst. Evol. Microbiol.* **2004**, 54, (Pt 2), 475-480.
8. Bartling, P.; Vollmers, J.; Petersen, J., The first world swimming championships of *roseobacters*-Phylogenomic insights into an exceptional motility phenotype. *Syst. Appl. Microbiol.* **2018**, 41, (6), 544-554.
9. Park, J. R.; Bae, J. W.; Nam, Y. D.; Chang, H. W.; Kwon, H. Y.; Quan, Z. X.; Park, Y. H., *Sulfitobacter litoralis* sp. nov., a marine bacterium isolated from the East Sea, Korea. *Int. J. Syst. Evol. Microbiol.* **2007**, 57, (Pt 4), 692-695.
10. Lian, F. B.; Li, Y. Q.; Zhang, J.; Jiang, S.; Du, Z. J., *Sulfitobacter maritimus* sp. nov., isolated from coastal sediment. *Int. J. Syst. Evol. Microbiol.* **2021**, 71, (2).
11. Raimundo, I.; Silva, S. G.; Costa, R.; Keller-Costa, T., Bioactive secondary metabolites from octocoral-associated microbes-new chances for blue growth. *Mar Drugs* **2018**, 16, (12), 485.
12. Sweet, M.; Villela, H.; Keller-Costa, T.; Costa, R.; Romano, S.; Bourne, D. G.; Cardenas, A.; Huggett, M. J.; Kerwin, A. H.; Kuek, F.; Medina, M.; Meyer, J. L.; Muller, M.; Pollock, F. J.; Rappe, M. S.; Sere, M.; Sharp, K. H.; Voolstra, C. R.; Zaccardi, N.; Ziegler, M.; Peixoto, R., Insights into the cultured bacterial fraction of corals. *mSystems* **2021**, 6, (3), e01249-20.
13. Almeida, J. F.; Marques, M.; Oliveira, V.; Egas, C.; Mil-Homens, D.; Viana, R.; Cleary, D. F. R.; Huang, Y. M.; Fialho, A. M.; Teixeira, M. C.; Gomes, N. C. M.; Costa, R.; Keller-Costa, T., Marine sponge and octocoral-associated bacteria show versatile secondary metabolite biosynthesis potential and antimicrobial activities against human pathogens. *Mar. Drugs* **2023**, 21, (1), 34.
14. Kwak, M. J.; Lee, J. S.; Lee, K. C.; Kim, K. K.; Eom, M. K.; Kim, B. K.; Kim, J. F., *Sulfitobacter geojensis* sp. nov., *Sulfitobacter noctilucae* sp. nov., and *Sulfitobacter noctilucicola* sp. nov., isolated from coastal seawater. *Int. J. Syst. Evol. Microbiol.* **2014**, 64, (Pt 11), 3760-3767.
15. Mas-Llado, M.; Pina-Villalonga, J. M.; Brunet-Galmes, I.; Nogales, B.; Bosch, R., Draft genome sequences of two isolates of the *Roseobacter* group, *Sulfitobacter* sp. strains 3SOLIMAR09 and 1FIGIMAR09, from harbors of Mallorca Island (Mediterranean Sea). *Genome Announc* **2014**, 2, (3), e00350-14.
16. Park, S.; Kim, I. K.; Lee, J. S.; Yoon, J. H., *Sulfitobacter sabulilitoris* sp. nov., isolated from marine sand. *Int. J. Syst. Evol. Microbiol.* **2019**, 69, (10), 3230-3236.
17. Kumari, P.; Bhattacharjee, S.; Poddar, A.; Das, S. K., *Sulfitobacter faviae* sp. nov., isolated from the coral *Favia veroni*. *Int. J. Syst. Evol. Microbiol.* **2016**, 66, (10), 3786-3792.
18. Guindon, S.; Dufayard, J. F.; Lefort, V.; Anisimova, M.; Hordijk, W.; Gascuel, O., New algorithms and methods to estimate maximum-likelihood phylogenies: assessing the performance of PhyML 3.0. *Syst Biol* **2010**, 59, (3), 307-21.
19. Kurtz, S.; Phillippy, A.; Delcher, A. L.; Smoot, M.; Shumway, M.; Antonescu, C.; Salzberg, S. L., Versatile and open software for comparing large genomes. *Genome Biol.* **2004**, 5, (2), R12.
20. Cantalapiedra, C. P.; Hernandez-Plaza, A.; Letunic, I.; Bork, P.; Huerta-Cepas, J., eggNOG-mapper v2: functional annotation, orthology assignments, and domain prediction at the metagenomic scale. *Mol. Biol. Evol.* **2021**, 38, (12), 5825-5829.
